# Supplementary material
Source: PubMed Central journal article supplement (PMC5759780)
Supplement: NIHMS929976-supplement-Supplemental_Figure_2.pdf [file NIHMS929976-supplement-Supplemental_Figure_2.pdf]

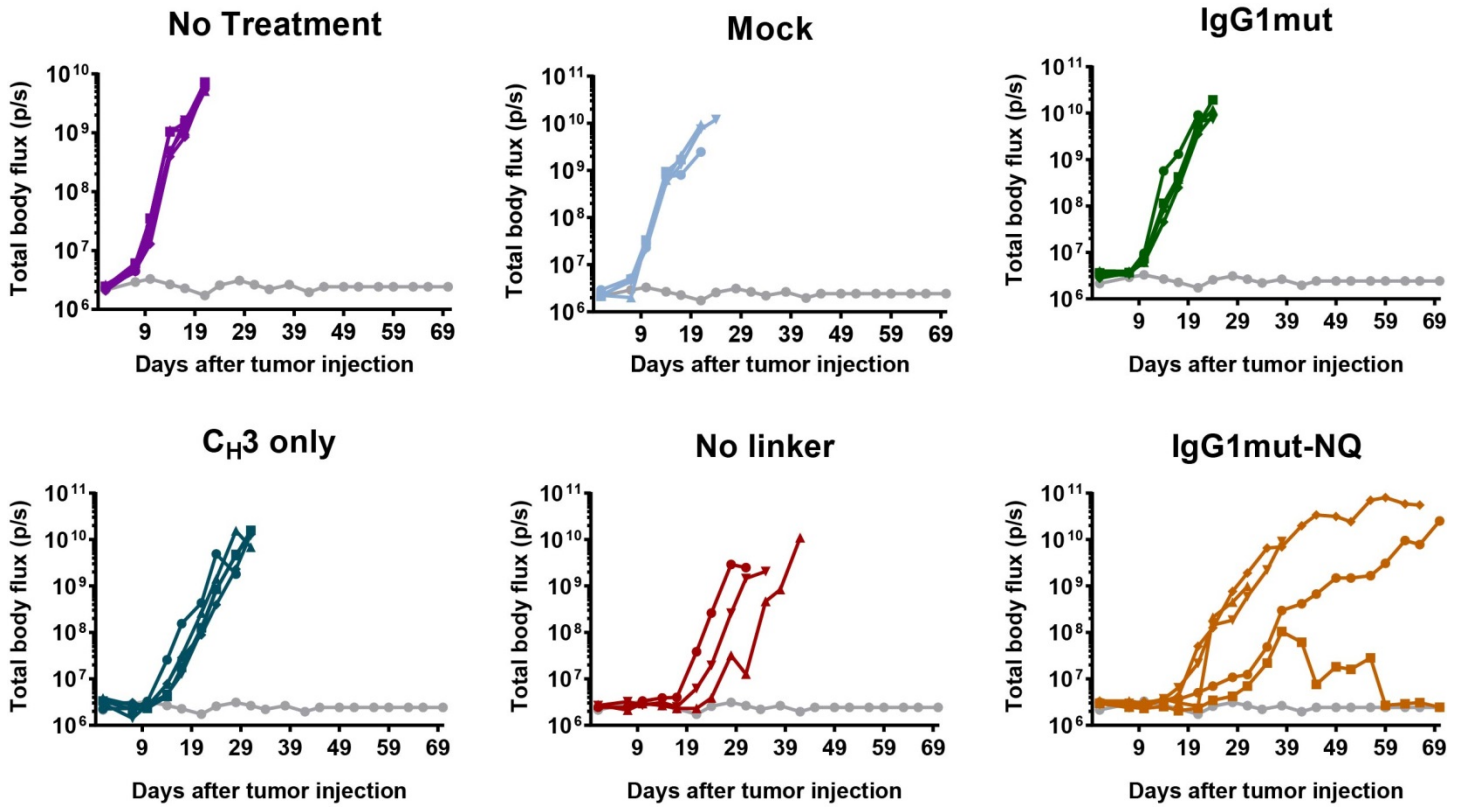

**Figure S2. Modification of extracellular spacer domain improves in vivo function of CD20 CARs.** NSG mice bearing disseminated Raji-ffLuc tumors were treated with healthy-donor derived T<sub>CM</sub>-enriched T cells transduced with various CD20 CAR lentiviral vector constructs as described in Figure 1F. Tumor burden was measured by bioluminescence over time. The tumor burdens of individual mice are shown.
