# Supplementary material
Source: PubMed Central journal article supplement (PMC5759780)

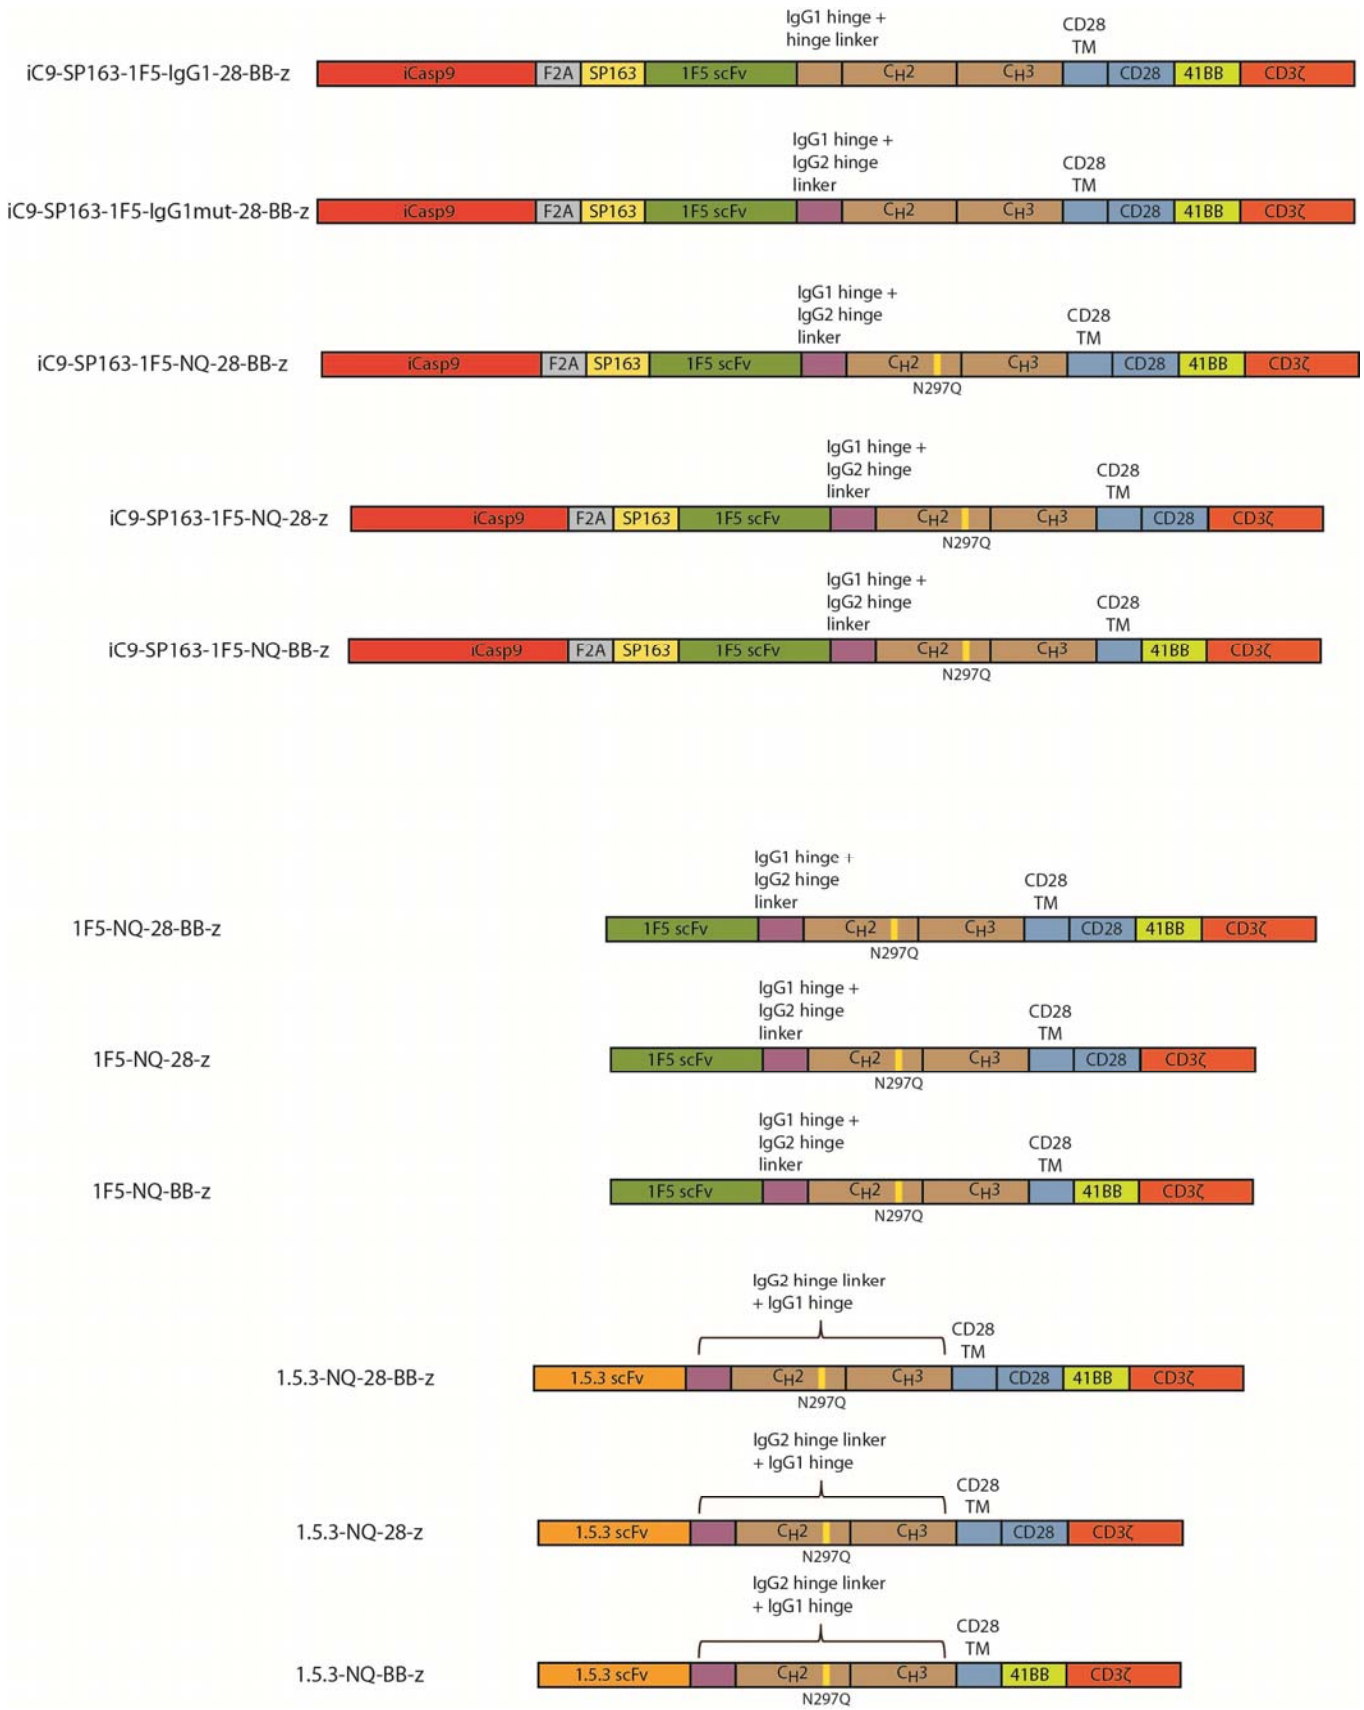

**Figure S1. Schematic diagrams of selected CD20 CAR constructs.**

Supplement: NIHMS929976-supplement-Supplemental_Figure_1.pdf [file NIHMS929976-supplement-Supplemental_Figure_1.pdf]
